# Supplementary material for: Cardiac adverse events associated with chloroquine and hydroxychloroquine exposure in 20 years of drug safety surveillance reports
Source: PubMed Central journal article supplement (PMC7644696; doi:10.1038/s41598-020-76258-0), 2020-11-05
Supplement: 41598_2020_76258_MOESM1_ESM.pdf [file 41598_2020_76258_MOESM1_ESM.pdf]

## Cardiac adverse events associated with chloroquine and hydroxychloroquine exposure in 20 years of drug safety surveillance reports

Isaac V. Cohen<sup>1</sup>, Tigran Makunts<sup>2,3</sup>, Talar Moumedjian<sup>2</sup>, Masara A. Issa<sup>2</sup>, Ruben Abagyan<sup>2\*</sup>

<sup>1</sup> Clinical Pharmacology and Therapeutics, University of California San Francisco, San Francisco, California, United States

<sup>2</sup> Skaggs School of Pharmacy and Pharmaceutical Sciences, University of California San Diego, La Jolla, California, United States

<sup>3</sup> Oak Ridge Institute of Science and Education, Center for Drug Evaluation and Research, United States Food and Drug Administration, Silver Spring, Maryland, United States

\*Correspondence to RA: [rabagyan@health.ucsd.edu](mailto:rabagyan@health.ucsd.edu)

### Supplementary information

**Table S1. List of all Cardiac ADR Terms**

| Cardiac ADR Term List                       |
|---------------------------------------------|
| accelerated_idioventricular_rhythm          |
| acquired_cardiac_septal_defect              |
| acute_coronary_syndrome                     |
| acute_endocarditis                          |
| acute_left_ventricular_failure              |
| acute_myocardial_infarction                 |
| acute_right_ventricular_failure             |
| adams_stokes_syndrome                       |
| age_indeterminate_myocardial_infarction     |
| alveolar_arterial_oxygen_gradient_increased |
| angina_bullosa_haemorrhagica                |
| angina_pectoris                             |
| angina_unstable                             |
| angiocardiogram                             |
| anterior_spinal_artery_syndrome             |
| aortic_arteriosclerosis                     |
| arrhythmia                                  |
| arrhythmia_supraventricular                 |
| arrhythmogenic_right_ventricular_dysplasia  |
| atrial_enlargement                          |
| atrial_fibrillation                         |
| atrial_flutter                              |

|                                      |
|--------------------------------------|
| atrial_hypertrophy                   |
| atrial_rupture                       |
| atrial_septal_defect                 |
| atrial_septal_defect_acquired        |
| atrial_tachycardia                   |
| atrial_thrombosis                    |
| atrioventricular_block               |
| atrioventricular_block_complete      |
| atrioventricular_block_first_degree  |
| atrioventricular_block_second_degree |
| atrioventricular_block_third_degree  |
| atrioventricular_dissociation        |
| basilar_artery_aneurysm              |
| basilar_artery_occlusion             |
| basilar_artery_stenosis              |
| basilar_artery_thrombosis            |
| biopsy_artery                        |
| biopsy_artery_normal                 |
| biopsy_heart                         |
| biopsy_heart_abnormal                |
| bleeding_varicose_vein               |
| bradyarrhythmia                      |
| bradycardia                          |
| bradycardia_foetal                   |
| bundle_branch_block                  |
| bundle_branch_block_bilateral        |
| bundle_branch_block_left             |
| bundle_branch_block_right            |
| cardiac_ablation                     |
| cardiac_amyloidosis                  |
| cardiac_aneurysm                     |
| cardiac_arrest                       |
| cardiac_arrest_neonatal              |
| cardiac_assistance_device_user       |
| cardiac_asthma                       |
| cardiac_cirrhosis                    |
| cardiac_death                        |
| cardiac_discomfort                   |
| cardiac_disorder                     |
| cardiac_dysfunction                  |
| cardiac_enzymes_increased            |

|                                    |
|------------------------------------|
| cardiac_failure                    |
| cardiac_failure_acute              |
| cardiac_failure_chronic            |
| cardiac_failure_congestive         |
| cardiac_failure_high_output        |
| cardiac_fibrillation               |
| cardiac_flutter                    |
| cardiac_function_test_abnormal     |
| cardiac_hypertrophy                |
| cardiac_imaging_procedure_abnormal |
| cardiac_index_decreased            |
| cardiac_monitoring                 |
| cardiac_monitoring_abnormal        |
| cardiac_murmur                     |
| cardiac_murmur_functional          |
| cardiac_output_decreased           |
| cardiac_output_increased           |
| cardiac_perforation                |
| cardiac_pseudoaneurysm             |
| cardiac_sarcoidosis                |
| cardiac_septal_defect              |
| cardiac_septal_hypertrophy         |
| cardiac_steatosis                  |
| cardiac_stress_test_abnormal       |
| cardiac_tamponade                  |
| cardiac_valve_abscess              |
| cardiac_valve_disease              |
| cardiac_valve_rupture              |
| cardiac_valve_sclerosis            |
| cardiac_valve_thickening           |
| cardiac_valve_vegetation           |
| cardiac_ventricular_disorder       |
| cardiac_ventricular_thrombosis     |
| cardio_respiratory_arrest          |
| cardio_respiratory_distress        |
| cardiogenic_shock                  |
| cardiomegaly                       |
| cardiometabolic_syndrome           |
| cardiomyopathy                     |
| cardiomyopathy_acute               |
| cardiomyopathy_alcoholic           |

|                                         |
|-----------------------------------------|
| cardiopulmonary_failure                 |
| cardiospasm                             |
| cardiotoxicity                          |
| cardiovascular_deconditioning           |
| cardiovascular_disorder                 |
| cardiovascular_function_test_abnormal   |
| cardiovascular_insufficiency            |
| cardiovascular_symptom                  |
| cardioversion                           |
| carditis                                |
| chronic_left_ventricular_failure        |
| complications_of_transplanted_heart     |
| congenital_arterial_malformation        |
| congenital_atrial_septal_defect         |
| congenital_cardiovascular_anomaly       |
| congenital_cerebrovascular_anomaly      |
| congenital_coronary_artery_malformation |
| congenital_heart_valve_disorder         |
| congenital_heart_valve_incompetence     |
| congenital_mitral_valve_incompetence    |
| congestive_cardiomyopathy               |
| coronary_angioplasty                    |
| coronary_arterial_stent_insertion       |
| coronary_artery_aneurysm                |
| coronary_artery_atherosclerosis         |
| coronary_artery_bypass                  |
| coronary_artery_dilatation              |
| coronary_artery_disease                 |
| coronary_artery_dissection              |
| coronary_artery_embolism                |
| coronary_artery_insufficiency           |
| coronary_artery_occlusion               |
| coronary_artery_perforation             |
| coronary_artery_reocclusion             |
| coronary_artery_restenosis              |
| coronary_artery_stenosis                |
| coronary_artery_surgery                 |
| coronary_artery_thrombosis              |
| coronary_bypass_stenosis                |
| coronary_bypass_thrombosis              |
| coronary_endarterectomy                 |

|                                                   |
|---------------------------------------------------|
| coronary_no_reflow_phenomenon                     |
| coronary_ostial_stenosis                          |
| coronary_revascularisation                        |
| coronary_vein_stenosis                            |
| cutaneous_vasculitis                              |
| defect_conduction_intraventricular                |
| degenerative_mitral_valve_disease                 |
| diabetic_cardiomyopathy                           |
| diastolic_dysfunction                             |
| dieulafoy_s_vascular_malformation                 |
| diffuse_vasculitis                                |
| dilatation_atrial                                 |
| dilatation_ventricular                            |
| disseminated_intravascular_coagulation            |
| ductus_arteriosus_premature_closure               |
| ductus_arteriosus_stenosis_foetal                 |
| ecg_signs_of_myocardial_ischaemia                 |
| echocardiogram                                    |
| echocardiogram_abnormal                           |
| electrocardiogram                                 |
| electrocardiogram_abnormal                        |
| electrocardiogram_ambulatory_abnormal             |
| electrocardiogram_change                          |
| electrocardiogram_p_pulmonale                     |
| electrocardiogram_p_wave_abnormal                 |
| electrocardiogram_pacemaker_spike                 |
| electrocardiogram_poor_r_wave_progression         |
| electrocardiogram_pq_interval_prolonged           |
| electrocardiogram_pr_prolongation                 |
| electrocardiogram_q_wave_abnormal                 |
| electrocardiogram_q_waves                         |
| electrocardiogram_qrs_complex_prolonged           |
| electrocardiogram_qrs_complex_shortened           |
| electrocardiogram_qt_corrected_interval_prolonged |
| electrocardiogram_qt_interval_abnormal            |
| electrocardiogram_qt_prolonged                    |
| electrocardiogram_qt_shortened                    |
| electrocardiogram_repolarisation_abnormality      |
| electrocardiogram_st_segment_abnormal             |
| electrocardiogram_st_segment_depression           |
| electrocardiogram_st_segment_elevation            |

|                                              |
|----------------------------------------------|
| electrocardiogram_st_t_change                |
| electrocardiogram_st_t_segment_abnormal      |
| electrocardiogram_st_t_segment_elevation     |
| electrocardiogram_t_wave_abnormal            |
| electrocardiogram_t_wave_amplitude_decreased |
| electrocardiogram_t_wave_amplitude_increased |
| electrocardiogram_t_wave_inversion           |
| electrocardiogram_t_wave_peaked              |
| endarterectomy                               |
| endocardial_disease                          |
| endocardial_fibroelastosis                   |
| endocardial_fibrosis                         |
| endocarditis                                 |
| endocarditis_fibroplastica                   |
| endocarditis_noninfective                    |
| endocarditis_q_fever                         |
| exercise_electrocardiogram_abnormal          |
| extrasystoles                                |
| femoral_arterial_stenosis                    |
| foetal_arrhythmia                            |
| foetal_cardiac_disorder                      |
| foetal_heart_rate_abnormal                   |
| foetal_heart_rate_deceleration               |
| foetal_heart_rate_deceleration_abnormality   |
| foetal_heart_rate_decreased                  |
| foetal_heart_rate_disorder                   |
| foetal_heart_rate_increased                  |
| haemorrhage_coronary_artery                  |
| haemorrhagic_arteriovenous_malformation      |
| haemorrhagic_vasculitis                      |
| heart_alteration                             |
| heart_block_congenital                       |
| heart_disease_congenital                     |
| heart_injury                                 |
| heart_rate                                   |
| heart_rate_abnormal                          |
| heart_rate_decreased                         |
| heart_rate_increased                         |
| heart_rate_irregular                         |
| heart_sounds_abnormal                        |
| heart_transplant                             |

|                                                   |
|---------------------------------------------------|
| heart_valve_calcification                         |
| heart_valve_incompetence                          |
| heart_valve_insufficiency                         |
| heart_valve_operation                             |
| heart_valve_replacement                           |
| heart_valve_stenosis                              |
| hyperkinetic_heart_syndrome                       |
| hypersensitivity_vasculitis                       |
| hypertensive_cardiomegaly                         |
| hypertensive_cardiomyopathy                       |
| hypertensive_heart_disease                        |
| hypertrophic_cardiomyopathy                       |
| hypertrophic_obstructive_cardiomyopathy           |
| in_stent_coronary_artery_restenosis               |
| increased_ventricular_afterload                   |
| increased_ventricular_preload                     |
| internal_carotid_artery_kinking                   |
| interventricular_septum_rupture                   |
| intracardiac_mass                                 |
| intracardiac_pressure_increased                   |
| intracardiac_thrombus                             |
| intraventricular_haemorrhage                      |
| intraventricular_haemorrhage_neonatal             |
| ischaemic_cardiomyopathy                          |
| left_atrial_dilatation                            |
| left_atrial_enlargement                           |
| left_atrial_hypertrophy                           |
| left_to_right_cardiac_shunt                       |
| left_ventricular_dilatation                       |
| left_ventricular_dysfunction                      |
| left_ventricular_end_diastolic_pressure_decreased |
| left_ventricular_end_diastolic_pressure_increased |
| left_ventricular_failure                          |
| left_ventricular_heave                            |
| left_ventricular_hypertrophy                      |
| lipomatous_hypertrophy_of_the_interatrial_septum  |
| low_cardiac_output_syndrome                       |
| ludwig_angina                                     |
| lupus_endocarditis                                |
| lupus_myocarditis                                 |
| lupus_vasculitis                                  |

|                                       |
|---------------------------------------|
| malignant_hypertensive_heart_disease  |
| malignant_pericardial_neoplasm        |
| mean_arterial_pressure_increased      |
| microvascular_coronary_artery_disease |
| mitral_valve_calcification            |
| mitral_valve_disease                  |
| mitral_valve_disease_mixed            |
| mitral_valve_incompetence             |
| mitral_valve_prolapse                 |
| mitral_valve_repair                   |
| mitral_valve_replacement              |
| mitral_valve_sclerosis                |
| mitral_valve_stenosis                 |
| multiple_cardiac_defects              |
| myocardial_abscess                    |
| myocardial_bridging                   |
| myocardial_calcification              |
| myocardial_depression                 |
| myocardial_fibrosis                   |
| myocardial_haemorrhage                |
| myocardial_hypoxia                    |
| myocardial_infarction                 |
| myocardial_ischaemia                  |
| myocardial_necrosis                   |
| myocardial_necrosis_marker            |
| myocardial_necrosis_marker_increased  |
| myocardial_oedema                     |
| myocardial_rupture                    |
| myocardial_stunning                   |
| myocarditis                           |
| myocarditis_bacterial                 |
| myocarditis_infectious                |
| myocarditis_mycotic                   |
| myocarditis_post_infection            |
| myocarditis_rheumatic                 |
| myocarditis_septic                    |
| myopericarditis                       |
| nodal_arrhythmia                      |
| oedema_due_to_cardiac_disease         |
| palpitations                          |
| paroxysmal_arrhythmia                 |



|                                               |
|-----------------------------------------------|
| patent_ductus_arteriosus                      |
| pericardial_calcification                     |
| pericardial_cyst                              |
| pericardial_disease                           |
| pericardial_drainage                          |
| pericardial_effusion                          |
| pericardial_excision                          |
| pericardial_fibrosis                          |
| pericardial_haemorrhage                       |
| pericardial_mass                              |
| pericardial_neoplasm                          |
| pericardial_operation                         |
| pericardial_rub                               |
| pericarditis                                  |
| pericarditis_adhesive                         |
| pericarditis_constrictive                     |
| pericarditis_infective                        |
| pericarditis_lupus                            |
| pericarditis_rheumatic                        |
| pericarditis_uraemic                          |
| periprocedural_myocardial_infarction          |
| pleuropericarditis                            |
| post_procedural_myocardial_infarction         |
| postinfarction_angina                         |
| postpartum_venous_thrombosis                  |
| postpericardiotomy_syndrome                   |
| postural_orthostatic_tachycardia_syndrome     |
| prinzmetal_angina                             |
| prosthetic_cardiac_valve_thrombosis           |
| purulent_pericarditis                         |
| restrictive_cardiomyopathy                    |
| rheumatic_heart_disease                       |
| rhythm_idioventricular                        |
| right_atrial_dilatation                       |
| right_atrial_hypertrophy                      |
| right_atrial_pressure_increased               |
| right_ventricular_dilatation                  |
| right_ventricular_dysfunction                 |
| right_ventricular_ejection_fraction_decreased |
| right_ventricular_enlargement                 |
| right_ventricular_failure                     |

|                                               |
|-----------------------------------------------|
| right_ventricular_heave                       |
| right_ventricular_hypertrophy                 |
| right_ventricular_systolic_pressure_decreased |
| right_ventricular_systolic_pressure_increased |
| scan_myocardial_perfusion_abnormal            |
| silent_myocardial_infarction                  |
| sinoatrial_block                              |
| sinus_arrhythmia                              |
| sinus_bradycardia                             |
| sinus_node_dysfunction                        |
| sinus_tachycardia                             |
| somatoform_disorder_cardiovascular            |
| stress_cardiomyopathy                         |
| stress_echocardiogram_abnormal                |
| subacute_endocarditis                         |
| subclavian_artery_occlusion                   |
| subclavian_artery_stenosis                    |
| subclavian_artery_thrombosis                  |
| subclavian_vein_occlusion                     |
| subclavian_vein_thrombosis                    |
| subendocardial_ischaemia                      |
| sudden_cardiac_death                          |
| supraventricular_extrasystoles                |
| supraventricular_tachyarrhythmia              |
| supraventricular_tachycardia                  |
| systolic_dysfunction                          |
| tachyarrhythmia                               |
| tachycardia                                   |
| tachycardia_foetal                            |
| tachycardia_induced_cardiomyopathy            |
| tachycardia_paroxysmal                        |
| temporal_arteritis                            |
| torsade_de_pointes                            |
| ventricular_arrhythmia                        |
| ventricular_asystole                          |
| ventricular_dysfunction                       |
| ventricular_dyskinesia                        |
| ventricular_dyssynchrony                      |
| ventricular_enlargement                       |
| ventricular_extrasystoles                     |
| ventricular_failure                           |

|                                    |
|------------------------------------|
| ventricular_fibrillation           |
| ventricular_flutter                |
| ventricular_hyperkinesia           |
| ventricular_hypertrophy            |
| ventricular_hypokinesia            |
| ventricular_hypoplasia             |
| ventricular_septal_defect          |
| ventricular_septal_defect_acquired |
| ventricular_tachyarrhythmia        |
| ventricular_tachycardia            |
| ventriculo_vascular_shunt          |
| wolff_parkinson_white_syndrome     |

**Table S2. List of all NSAID Terms**

| <b>NSAID Term List</b> |
|------------------------|
| Ampiroxicam            |
| Celecoxib              |
| Chlortenoxicam         |
| Dexibuprofen           |
| Diclofenac             |
| Diflunisal             |
| Droxicam               |
| Etodolac               |
| Fenoprofen             |
| Firocoxib              |
| Flufenamic             |
| Ibuprofen              |
| Indomethacin           |
| Isoxicam               |
| Ketoprofen             |
| Ketorolac              |
| Lornoxicam             |
| Loxoprofen             |
| Meclofenamic           |
| Mefanemic              |
| Meloxicam              |
| Nabumetone             |
| Naproxen               |
| Parecoxib              |
| Phenylbutazone         |

|            |
|------------|
| Piroxicam  |
| Rofecoxib  |
| Sulindac   |
| Tenoxicam  |
| Tolfenamic |
| Tolmetin   |
| Valdecoxib |

**Table S3. Sample Size for Subsample**

|                                           | <b>Subgroup</b> | <b>Controls</b> | <b>Chloroquine</b> | <b>Hydroxychloroquine</b> |
|-------------------------------------------|-----------------|-----------------|--------------------|---------------------------|
| <b>Full Set:</b>                          | <i>RA</i>       | 625,541         | 1,055              | 59,078                    |
|                                           | <i>SLE</i>      | 14,449          | 225                | 5,926                     |
| <b>Subset with Age and Sex Available:</b> | <i>RA</i>       | 454,309         | 791                | 41,099                    |
|                                           | <i>SLE</i>      | 9,249           | 179                | 4,572                     |

**Figure S1. Most Common ADRs Observed in Each Cohort**

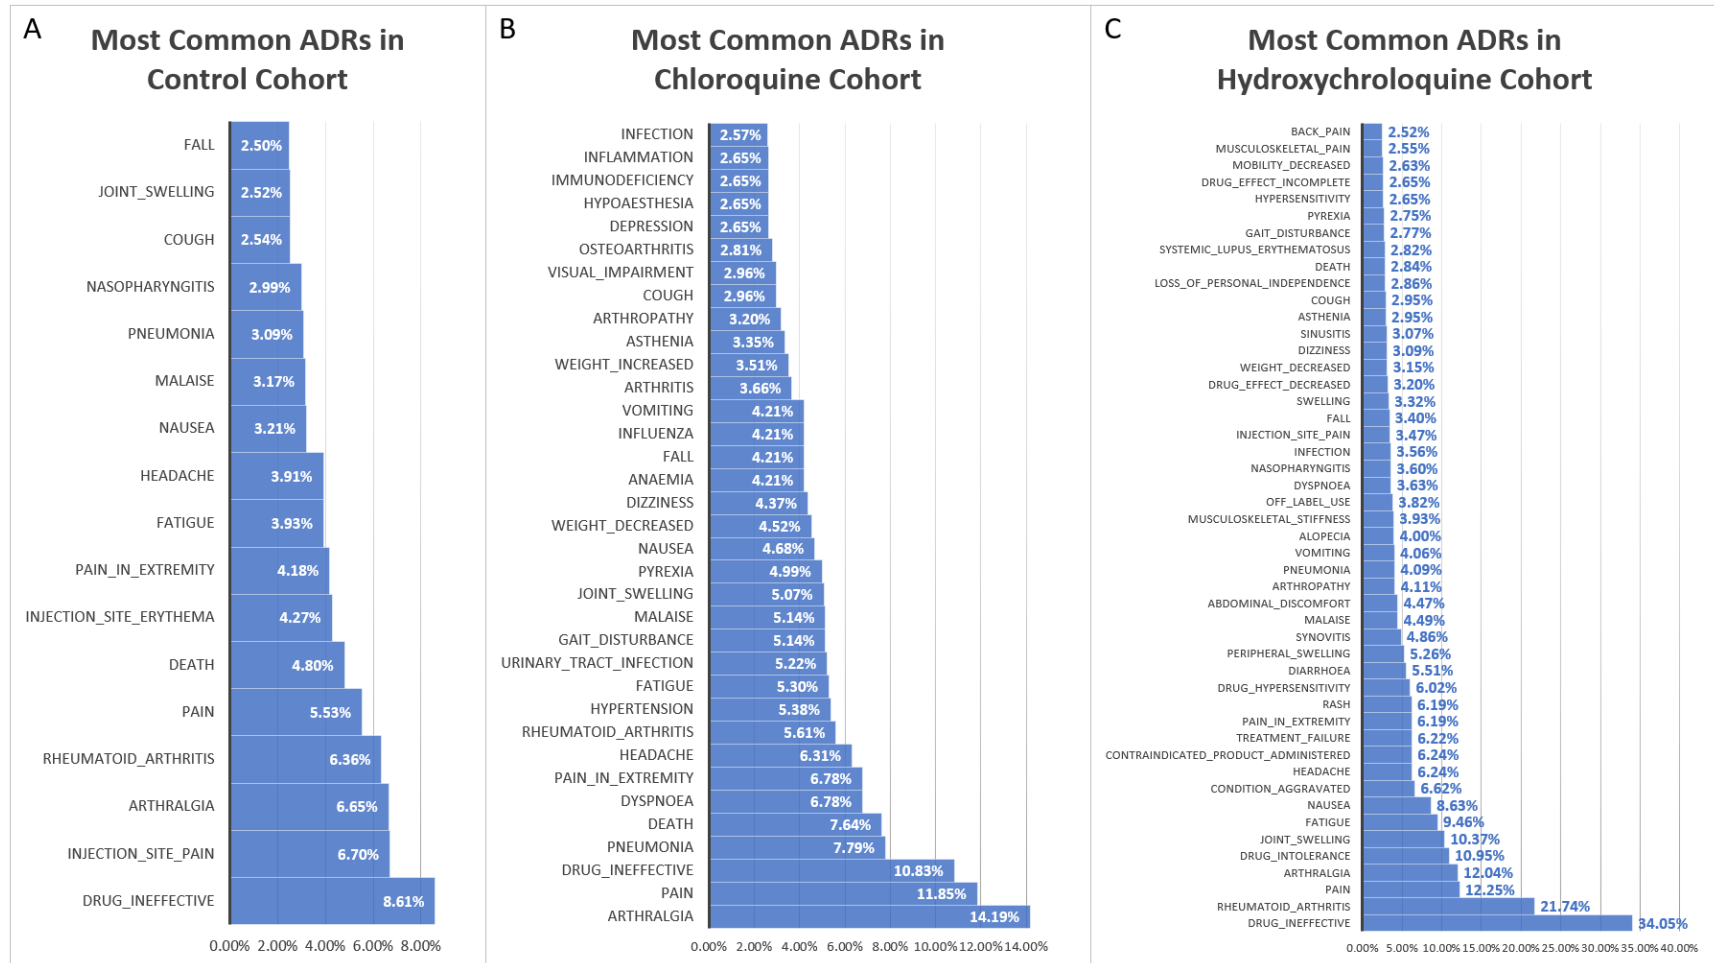

**Figure S1 Legend.** The most common adverse drug reactions (ADRs) with frequencies above 2.5% are presented for each of the three cohorts: (a) Control group, n = 639,990, (b) Chloroquine group, n = 1,280, and (c) Hydroxychloroquine group, n = 65,004.
